# Supplementary material for: Amphibian Taxonomic and Functional Diversity in a Heterogeneous Landscape of West-Central Mexico
Source: MDPI journal article supplement (doi:10.3390/d14090738), 2022-09-08
Supplement: s1 [file s1]

## **Supplementary Material**

### **Amphibian taxonomic and functional diversity in a heterogeneous landscape of west-central Mexico**

**Verónica Carolina Rosas-Espinoza<sup>1</sup>, Karen Elizabeth Peña-Joya<sup>2</sup>, Eliza Álvarez-Grzybowska<sup>1</sup>, Arquímedes Alfredo Godoy-González<sup>1</sup>, Ana Luisa Santiago-Pérez<sup>3</sup> & Fabián Alejandro Rodríguez-Zaragoza<sup>1\*</sup>**

<sup>1</sup>Laboratorio de Ecología Molecular, Microbiología y Taxonomía (LEMITAX), Departamento de Ecología, Centro Universitario de Ciencias Biológicas y Agropecuarias, Universidad de Guadalajara, Zapopan 45200, Jalisco, Mexico

<sup>2</sup>Laboratorio de Ecología, Paisaje y Sociedad, Centro Universitario de la Costa, Universidad de Guadalajara, Puerto Vallarta 48280, Jalisco, Mexico

<sup>3</sup>Departamento de Producción Forestal, Centro Universitario de Ciencias Biológicas y Agropecuarias, Universidad de Guadalajara, Zapopan 45200, Jalisco, Mexico

\*Corresponding author: [fabian.rzaragoza@academicos.udg.mx](mailto:fabian.rzaragoza@academicos.udg.mx)

Table S1. Structural habitat variables measured on the amphibian's land cover/use plots.

Note: Plus sign (+) corresponds to the predictive variable eliminated by its high collinearity with a Pearson correlation ( $r \geq 0.9$ ), while asterisks (\*) represent all variables considered in DistLM and dbRDA.

| Variable                        | Code | Description of variable                                                                                                                                                      |
|---------------------------------|------|------------------------------------------------------------------------------------------------------------------------------------------------------------------------------|
| Percentage of herbaceous cover* | CH   | 0%, minimum percentage<br>100%, maximum percentage                                                                                                                           |
| Percentage of shrub cover*      | CS   | 0%, minimum percentage<br>100%, maximum percentage                                                                                                                           |
| Percentage of tree cover*       | CT   | 0%, minimum percentage<br>100%, maximum percentage                                                                                                                           |
| Rock*                           | R    | 0, no rocks<br>1, a few rocks<br>2, a rock every 20 m<br>3, several rocks every 20 m<br>4, very abundant one rock every 1 to 3 m                                             |
| Stone*                          | S    | 0, no stones<br>1, a few stones<br>2, a stone every 20 m<br>3, several stones every 20 m<br>4, very abundant one stone every 1 to 3 m                                        |
| Leaf litter*                    | H    | 0, no litter<br>1, very disperse litter with no little layer<br>2, layer less than 5 cm in depth<br>3, layer with a deep between 5 to 10 cm<br>4, layer deep more than 10 cm |
| Fire*                           | F    | 0, no signal of fire<br>1, a signal of fire but no more than 50 cm in height<br>2, a signal of fire between 50 cm and 1m                                                     |

---

|                      |    |                                                                        |
|----------------------|----|------------------------------------------------------------------------|
|                      |    | 3, a signal of fire up to 1m, young dead trees                         |
|                      |    | 4, a signal of fire more than 1m, young trees dead and some adult ones |
| Cow grazing*         | CG | 0, no cow grazing                                                      |
|                      |    | 1, very dispersed feces and footprints                                 |
|                      |    | 2, feces and footprints every 50 m                                     |
|                      |    | 3, feces and footprints less than 50 m                                 |
|                      |    | 4, abundant feces and footprints and a clear road made by cattle       |
| Water*               | W  | 1, near a pool                                                         |
|                      |    | 2, near a stream                                                       |
|                      |    | 3, far from a water body                                               |
| Weather <sup>+</sup> | We | T, temperate                                                           |
|                      |    | W, tropical                                                            |

---

Table S2. Functional traits used in this study and their ecological meaning. A = Categorical data, U = Quantitative data.

| Type of functional trait/ Data type | Trait attributes                                                                                                                                                                                                                    | Ecosystem relationship                                                 | References              |
|-------------------------------------|-------------------------------------------------------------------------------------------------------------------------------------------------------------------------------------------------------------------------------------|------------------------------------------------------------------------|-------------------------|
| Reproductive                        |                                                                                                                                                                                                                                     |                                                                        |                         |
| Reproductive mode (A)               | 1. Eggs laid and developed in water<br>2. Eggs laid outside the water, on vegetation at the edge of water bodies<br>3. Eggs laid outside the water, on the ground, and larvae developed within the egg<br>4. Eggs laid on foam nest | Strategy and reproductive success and habitat use                      | Díaz-García et al. [1]  |
| Habitat related                     |                                                                                                                                                                                                                                     |                                                                        |                         |
| Diet (A)                            | 1. Small invertebrates<br>2. Small and medium-sized invertebrates<br>3. Invertebrates and small vertebrates (like frogs)<br>4. Generalist (invertebrates and vertebrates)<br>5. Termites and ants                                   | Recycling of nutrients and energy flow through food webs as predators. | Cortés-Gómez et al. [2] |
| Period of activity (A)              | 1. Diurnal<br>2. Diurnal-nocturnal                                                                                                                                                                                                  | Differential contribution of matter and energy in time                 | Cortés-Gómez et al. [2] |
| Microhabitat (A)                    | 1. Trees, shrubs, water<br>2. Water, rocks, and herbaceous vegetation near water                                                                                                                                                    | Differential contribution of matter and energy in space                | Díaz-García et al. [1]  |

|                    |                                                                                                                                                                                                                                                                                                               |                                                                              |                               |
|--------------------|---------------------------------------------------------------------------------------------------------------------------------------------------------------------------------------------------------------------------------------------------------------------------------------------------------------|------------------------------------------------------------------------------|-------------------------------|
|                    | 3. Litter, under rocks, edge of water bodies                                                                                                                                                                                                                                                                  |                                                                              |                               |
| Morphological      |                                                                                                                                                                                                                                                                                                               |                                                                              |                               |
| Size (U)           | Mean length rostrum-cloaca                                                                                                                                                                                                                                                                                    | Recycling of nutrients and energy flow through food webs as predator or prey | Cortés-Gómez et al. [2]       |
| Skin (A)           | 1. Smooth<br>2. Tuberculated<br>3. Pustulated                                                                                                                                                                                                                                                                 | Resistance to drying and hydrodynamic                                        | Cortés-Gómez et al. [2]       |
| Dorsal pattern (A) | 1. Numerous spots with variable shapes and sizes<br>2. Regular oval spots and two dorsolateral yellow lines<br>3. Homogeneous but possibly with dark spots, with a homogeneous lateral stripe<br>4. Green reticulated with a reticulated lateral dark stripe<br>5. Homogeneous green with isolated white dots | Differential use of space, predation, and anti-predatory strategies          | Álvarez-Grzybowska et al. [3] |
| Toxicity (A)       | 1. Toxic<br>2. Non-toxic                                                                                                                                                                                                                                                                                      | Nutrient recycling and energy flow through the trophic web                   | Cortés-Gómez et al. [2]       |

Table S3. Amphibian species recorded in the study area by land cover/use and protection category. Codes: sugar cane field (CA), riparian habitat surrounded by crops (RH-C), cornfield (CO), highly perturbed tropical dry forest (HPTDF), tropical dry forest (TDF), riparian habitat surrounded by tropical dry forest (RH-TDF), riparian habitat surrounded temperate forest (RH-TF), secondary vegetation surrounded by temperate forest (SV-TF), oak forest (OF) and pine-oak forest (POF).

| Family/Species                   | Code | Endemism | Nom-059-2010 | CA | RH-C | CO | HPTDF | TDF | RH-TDF | RH-TF | SV-TF | OF | POF |
|----------------------------------|------|----------|--------------|----|------|----|-------|-----|--------|-------|-------|----|-----|
| Craugastoridae                   |      |          |              |    |      |    |       |     |        |       |       |    |     |
| <i>Craugastor hobarthsmithi</i>  | Crho | E        |              |    | X    | X  | X     | X   |        |       |       |    |     |
| <i>Craugastor occidentalis</i>   | Croc | E        |              |    |      | X  |       | X   | X      | X     | X     | X  | X   |
| <i>Craugastor augusti</i>        | Crau |          |              |    |      |    | X     | X   | X      | X     | X     | X  | X   |
| Eleutherodactylidae              |      |          |              |    |      |    |       |     |        |       |       |    |     |
| <i>Eleutherodactylus sp.</i>     | Elpe | E        |              | X  | X    | X  | X     |     | X      | X     |       |    |     |
| Bufonidae                        |      |          |              |    |      |    |       |     |        |       |       |    |     |
| <i>Incilius occidentalis</i>     | Inoc | E        |              |    |      |    |       |     |        |       | X     | X  | X   |
| <i>Rhinella horribilis</i>       | Rhho |          |              | X  |      | X  | X     |     | X      |       |       |    |     |
| Hylidae                          |      |          |              |    |      |    |       |     |        |       |       |    |     |
| <i>Exerodonta smaragdina</i>     | Exsm | E        | Pr           |    |      |    |       |     |        |       | X     |    |     |
| <i>Dryophytes arenicolor</i>     | Drar |          |              |    |      |    |       | X   | X      | X     | X     |    |     |
| <i>Dryophytes eximius</i>        | Drex | E        |              |    |      |    |       |     | X      |       | X     |    |     |
| <i>Sarcohyala hapsa</i>          | Saha | E        | Pr           |    |      |    |       |     |        | X     |       |    |     |
| Leptodactylidae                  |      |          |              |    |      |    |       |     |        |       |       |    |     |
| <i>Leptodactylus melanonotus</i> | Leme |          |              | X  | X    |    |       |     | X      |       |       |    |     |
| Microhylidae                     |      |          |              |    |      |    |       |     |        |       |       |    |     |
| <i>Hypopachus variolosus</i>     | Hyva |          |              |    |      |    |       |     | X      |       |       |    |     |
| Phyllomedusidae                  |      |          |              |    |      |    |       |     |        |       |       |    |     |
| <i>Agalychnis dacnicolor</i>     | Agda | E        |              |    | X    |    |       |     |        |       |       |    |     |
| Ranidae                          |      |          |              |    |      |    |       |     |        |       |       |    |     |

|                          |      |    |   |   |   |  |   |   |   |
|--------------------------|------|----|---|---|---|--|---|---|---|
| <i>Rana cf. forreri</i>  | Rafo | Pr |   |   |   |  | X |   |   |
| <i>Rana neovolcanica</i> | Rane | E  | A | X | X |  | X | X | X |
| Scaphiopodidae           |      |    |   |   |   |  |   |   |   |
| <i>Spea multiplicata</i> | Spmu |    |   |   |   |  | X |   |   |

Table S4. Abundance-based diversity of orders  $q = 0, 1$ , and  $2$  for the amphibian assemblage per site in a heterogeneous land cover/use landscape in western-central Mexico. Maximum standardized coverage  $C_{\max} = 93\%$ . Codes: sugar cane field (CA), riparian habitat surrounded by crops (RH-C), cornfield (CO), highly perturbed tropical dry forest (HPTDF), tropical dry forest (TDF), riparian habitat surrounded by tropical dry forest (RH-TDF), riparian habitat surrounded temperate forest (RH-TF), secondary vegetation surrounded by temperate forest (SV-TF), oak forest (OF) and pine-oak forest (POF).

| <b>(A) Sample completeness profiles</b> |             |             |             |
|-----------------------------------------|-------------|-------------|-------------|
| Completeness                            | $q = 0$ (%) | $q = 1$ (%) | $q = 2$ (%) |
| CA                                      | 100         | 100         | 100         |
| RH-C                                    | 83          | 98          | 100         |
| CO                                      | 100         | 100         | 100         |
| HPTDF                                   | 75          | 88          | 95          |
| TDF                                     | 80          | 92          | 95          |
| RH-TDF                                  | 56          | 88          | 99          |
| RH-TF                                   | 83          | 94          | 75          |
| SV-TF                                   | 100         | 100         | 100         |
| OF                                      | 80          | 84          | 89          |
| POF                                     | 100         | 100         | 100         |
| <b>(B) Asymptotic analysis</b>          |             |             |             |
| Diversity                               | $q = 0$     | $q = 1$     | $q = 2$     |
| CA                                      |             |             |             |
| Asymptotic                              | 4           | 3.08        | 2.49        |
| Observed                                | 4           | 2.93        | 2.38        |
| Undetected                              | 0           | 0.15        | 0.11        |
| RH-C                                    |             |             |             |
| Asymptotic                              | 5.49        | 2.35        | 1.69        |
| Observed                                | 5           | 2.26        | 1.67        |
| Undetected                              | 0.49        | 0.09        | 0.02        |
| CO                                      |             |             |             |
| Asymptotic                              | 4           | 4.37        | 4.88        |



|            |       |      |      |
|------------|-------|------|------|
| Observed   | 4     | 3.86 | 3.76 |
| Undetected | 0     | 0.51 | 1.12 |
| HPTDF      |       |      |      |
| Asymptotic | 7.87  | 6.69 | 6.18 |
| Observed   | 6     | 5.15 | 4.59 |
| Undetected | 1.87  | 1.54 | 1.59 |
| TDF        |       |      |      |
| Asymptotic | 4.45  | 4.15 | 3.93 |
| Observed   | 4     | 3.46 | 3.1  |
| Undetected | 0.45  | 0.69 | 0.83 |
| RH-TDF     |       |      |      |
| Asymptotic | 17.76 | 9.36 | 6.68 |
| Observed   | 10    | 7.22 | 5.7  |
| Undetected | 7.76  | 2.14 | 0.98 |
| RH-TF      |       |      |      |
| Asymptotic | 5.11  | 6.3  | 9    |
| Observed   | 5     | 4.86 | 4.76 |
| Undetected | 0.11  | 1.44 | 4.24 |
| SV-TF      |       |      |      |
| Asymptotic | 7     | 3.61 | 2.29 |
| Observed   | 7     | 3.45 | 2.25 |
| Undetected | 0     | 0.16 | 0.04 |
| OF         |       |      |      |
| Asymptotic | 4.9   | 4.18 | 3.75 |
| Observed   | 4     | 3.3  | 2.94 |
| Undetected | 0.9   | 0.88 | 0.81 |
| POF        |       |      |      |
| Asymptotic | 3     | 2.57 | 2.29 |
| Observed   | 3     | 2.36 | 2.09 |
| Undetected | 0     | 0.21 | 0.20 |
| SV-TF      |       |      |      |

|            |   |      |      |
|------------|---|------|------|
| Asymptotic | 7 | 3.61 | 2.29 |
| Observed   | 7 | 3.45 | 2.25 |
| Undetected | 0 | 0.16 | 0.04 |

---

**(C) Species evenness**

---

|        | Pielou (J') | q = 1 | q = 2 |
|--------|-------------|-------|-------|
| CA     | 0.79        | 0.675 | 0.492 |
| RH-C   | 0.94        | 1     | 0.266 |
| CO     | 0.59        | 0.369 | 0.809 |
| HPTDF  | 0.91        | 0.811 | 0.696 |
| TDF    | 0.90        | 0.840 | 0.700 |
| RH-TDF | 0.82        | 0.598 | 0.422 |
| RH-TF  | 0.65        | 0.965 | 0.943 |
| SV-TF  | 0.97        | 0.442 | 0.241 |
| OF     | 0.85        | 0.740 | 0.609 |
| POF    | 0.81        | 0.708 | 0.557 |

---

Table S5. Results of the DistLM marginal and sequential tests to obtain the best predictable model between amphibian species composition and environmental variables across land cover/use types.

| (A) Marginal tests                |                               |          |                                      |                                      |                             |
|-----------------------------------|-------------------------------|----------|--------------------------------------|--------------------------------------|-----------------------------|
| Variable                          | Pseudo-F                      | P        | Explained<br>variation<br>proportion |                                      |                             |
| Percentage of tree cover          | 2.165                         | 0.112    | 0.213                                |                                      |                             |
| Percentage of scrub cover         | 0.788                         | 0.525    | 0.090                                |                                      |                             |
| Percentage of herbaceous<br>cover | 7.873                         | 0.0004   | 0.496                                |                                      |                             |
| Rock                              | 2.652                         | 0.066    | 0.248                                |                                      |                             |
| Stone                             | 2.531                         | 0.080    | 0.240                                |                                      |                             |
| Leaf litter                       | 1.328                         | 0.280    | 0.142                                |                                      |                             |
| Fire                              | 0.560                         | 0.713    | 0.065                                |                                      |                             |
| Cow grazing                       | 1.307                         | 0.295    | 0.140                                |                                      |                             |
| Water                             | 1.390                         | 0.265    | 0.148                                |                                      |                             |
| (B) Sequential test               |                               |          |                                      |                                      |                             |
| Variable                          | R <sup>2</sup> <sub>Adj</sub> | Pseudo-F | P                                    | Explained<br>variation<br>proportion | Cumulative<br>variation (%) |
| Percentage of herbaceous<br>cover | 0.433                         | 7.8731   | 0.0005                               | 0.496                                | 49.6                        |
| Cow grazing                       | 0.589                         | 4.0314   | 0.0126                               | 0.184                                | 68.0                        |
| Water                             | 0.723                         | 4.3732   | 0.0375                               | 0.135                                | 81.5                        |

## References

1. Díaz-García, J.M.; Pineda, E.; López-Barrera, F.; Moreno, C. E. Amphibian species and functional diversity as indicators of restoration success in tropical montane forest. *Biodivers. Conserv.* **2017**, *26*, 2569-2589. <https://doi.org/10.1007/s10531-017-1372-2>
2. Cortés-Gómez, A. M.; Ramírez, P. M. P.; Urbina C. N. Protocolo para la medición de rasgos funcionales en anfibios. In *La ecología funcional como aproximación al estudio, manejo y conservación de la biodiversidad: protocolos y aplicaciones*, Salgado-Negret, B., Ed.; Instituto de Investigación de Recursos Biológicos Alexander von Humboldt: Bogotá, D. C., Colombia, 2015; pp. 127- 179.
3. Álvarez-Grzybowska, E.; Urbina-Cardona, N.; Córdova-Tapia, F.; García, A. Amphibian communities in two contrasting ecosystems: functional diversity and environmental filters. *Biodivers. Conserv.* **2020**, *29*, 2457–2485. <https://doi.org/10.1007/s10531-020-01984-w>
